# Supplementary material
Source: PubMed Central journal article supplement (PMC3922836)
Supplement: supp_217.4.614_JEB092213.pdf [file supp_217.4.614_JEB092213.pdf]

**Table S1.** Populations of *M. lewisii* and *M. cardinalis* used in the NMDS analysis in Figure 1B

| Species              | Population name | Numbering in Figure 1B | Replicate collections | Source | County   | Nearest road         | Latitude | Longitude | Elevation |
|----------------------|-----------------|------------------------|-----------------------|--------|----------|----------------------|----------|-----------|-----------|
| <i>M. lewisii</i>    | LF10            | 1                      | 9                     | Inbred | Tuolumne | Evergreen Rd.        | 37.817   | -119.867  | 1350      |
| <i>M. lewisii</i>    | SL9             | 2                      | 4                     | Inbred | Tuolumne | Evergreen Rd.        | 37.817   | -119.867  | 1350      |
| <i>M. lewisii</i>    | ML52            | 3                      | 1                     | Wild   | Mariposa | Tioga Pass Rd.       | 37.83    | -119.48   | 2690      |
| <i>M. lewisii</i>    | SL2             | 4                      | 2                     | Wild   | Tuolumne | Evergreen Rd.        | 37.817   | -119.867  | 1350      |
| <i>M. lewisii</i>    | WL3             | 5                      | 4                     | Wild   | Mariposa | Wawona Rd.           | 37.53    | -119.65   | 1208      |
| <i>M. cardinalis</i> | CE10            | 6                      | 9                     | Inbred | Tuolumne | Evergreen Rd.        | 37.817   | -119.867  | 1350      |
| <i>M. cardinalis</i> | SC12            | 7                      | 2                     | Inbred | Tuolumne | Evergreen Rd.        | 37.817   | -119.867  | 1350      |
| <i>M. cardinalis</i> | FC2             | 8                      | 1                     | Wild   | Mariposa | Old Coulterville Rd. | 37.703   | -119.753  | 1316      |
| <i>M. cardinalis</i> | SC62            | 9                      | 1                     | Wild   | Tuolumne | Evergreen Rd.        | 37.82    | -119.87   | 1320      |
| <i>M. cardinalis</i> | WC32            | 10                     | 1                     | Wild   | Mariposa | Wawona Rd.           | 37.53    | -119.65   | 1208      |

Latitude, longitude, and elevation reflect the location of the original collection of the population; inbred lines have been inbred for over ten generations. All populations are drawn from the central Sierra Nevada mountain range in California USA.
